# Supplementary material for: Ferritinophagy mediated by the AMPK/ULK1 pathway is involved in ferroptosis subsequent to ventilator-induced lung injury
Source: PubMed Central journal article supplement — Respir Res. 2024 Dec 24;25:440. doi: 10.1186/s12931-024-03076-7 (PMC11669221; doi:10.1186/s12931-024-03076-7), 2024-12-24

**Figure1**

**D**

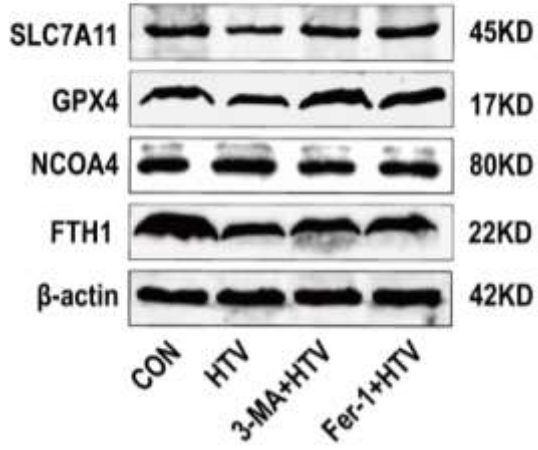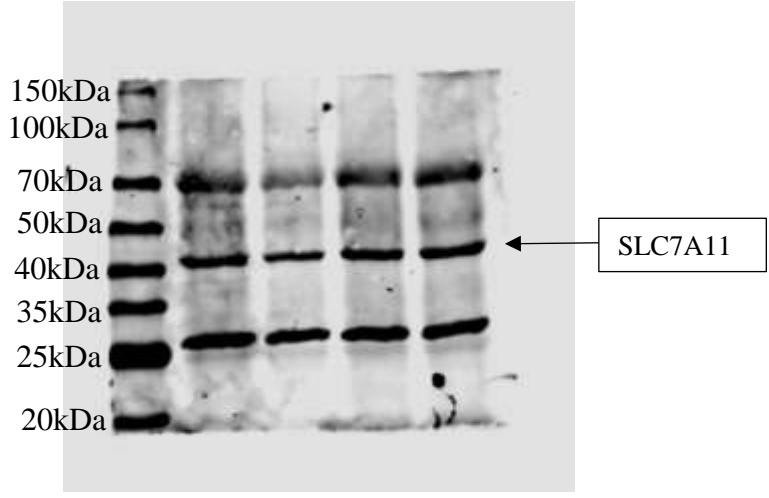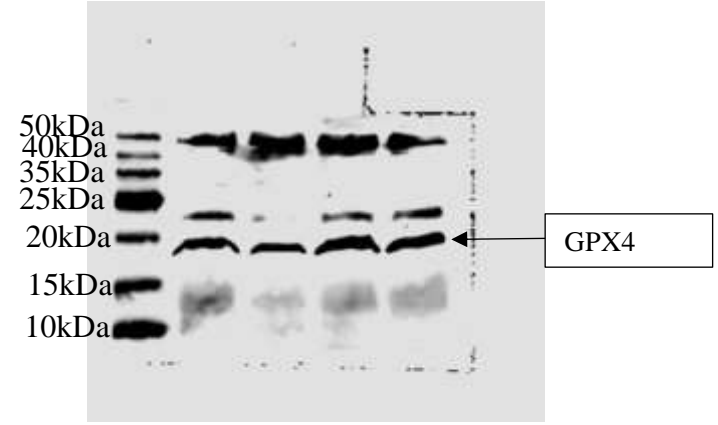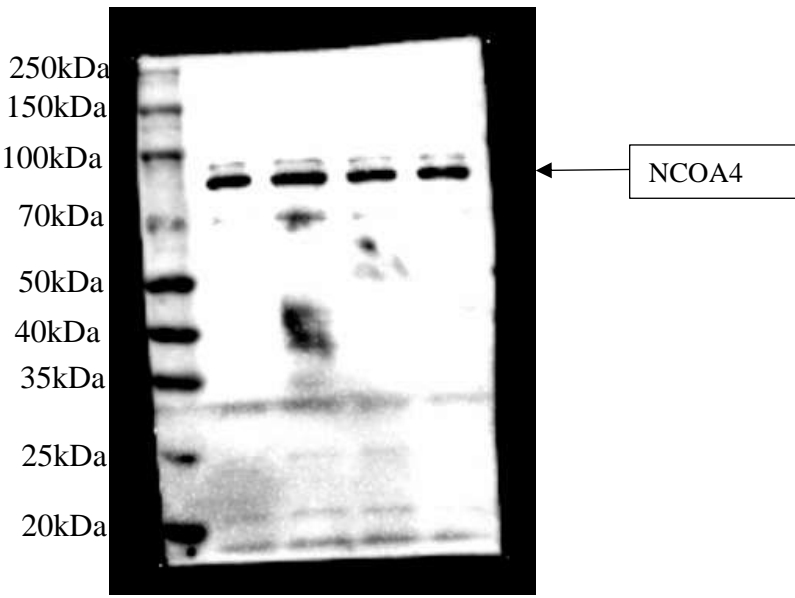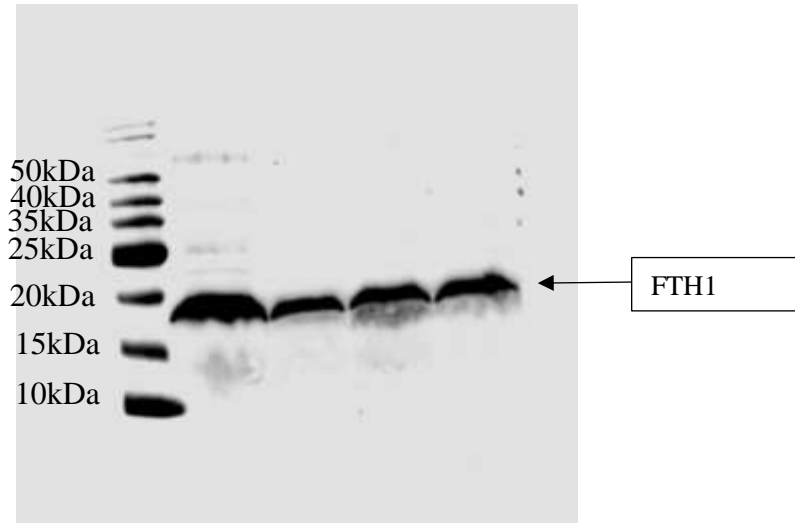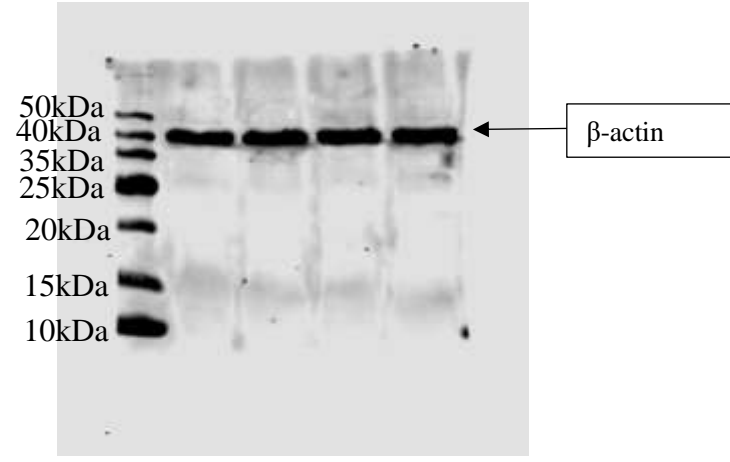

**Figure2**

**B**

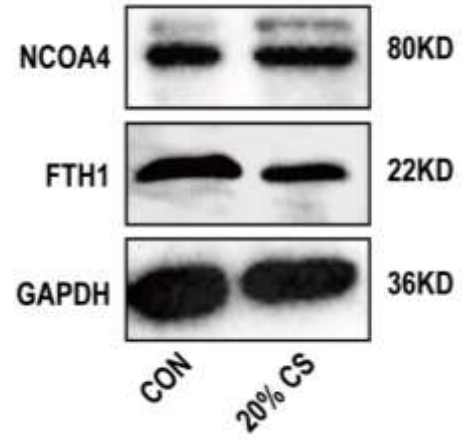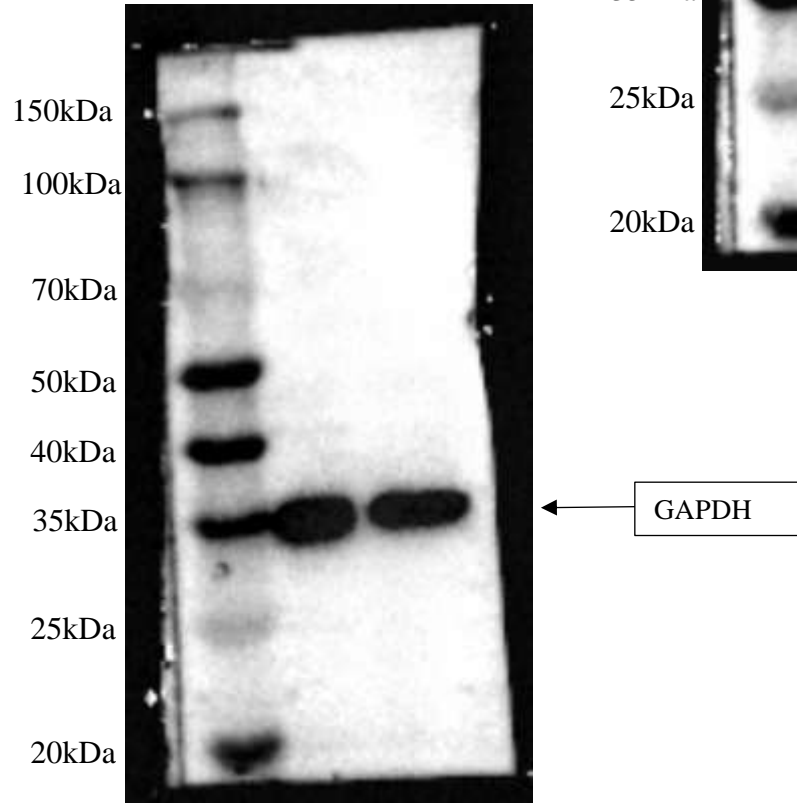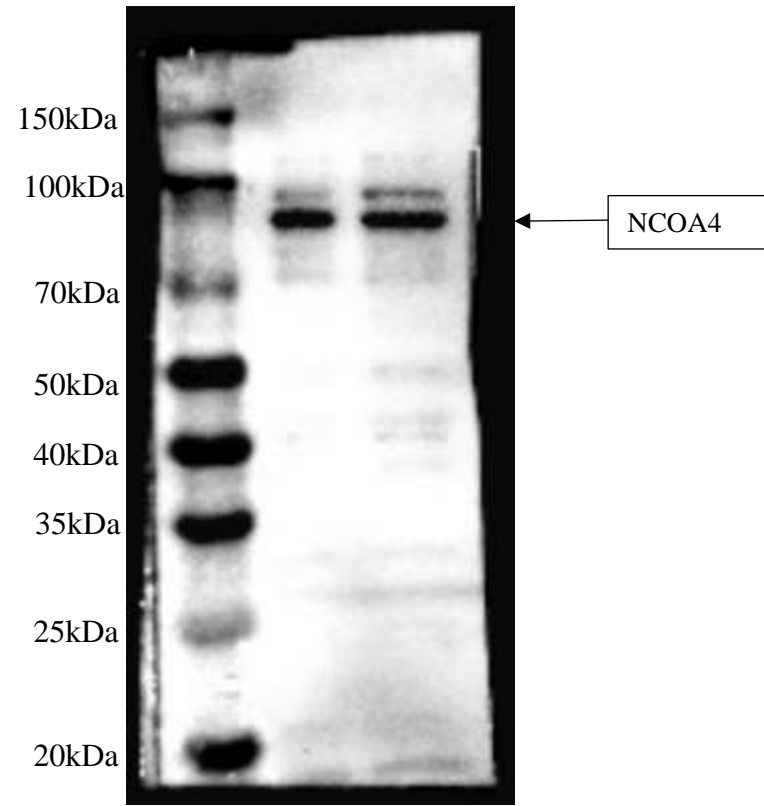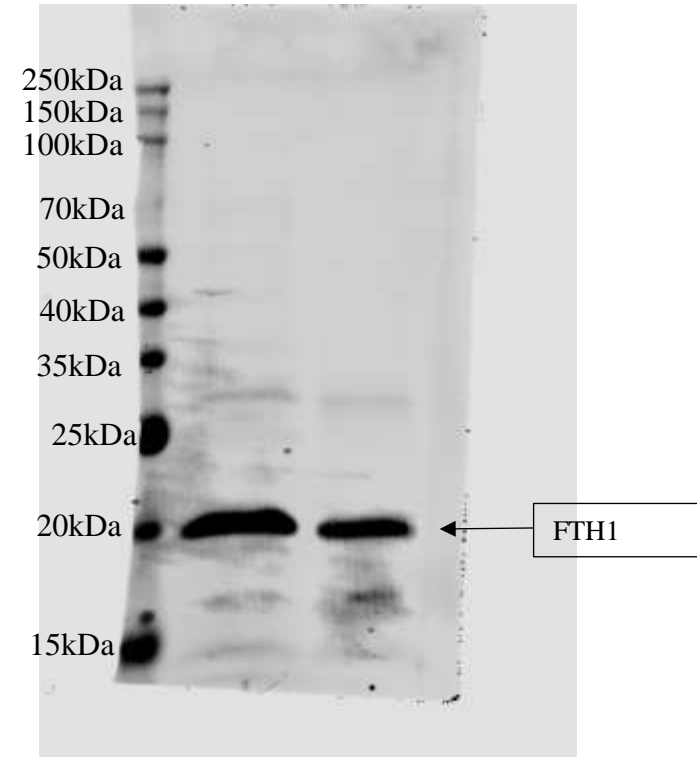

**Figure 3**

**F**

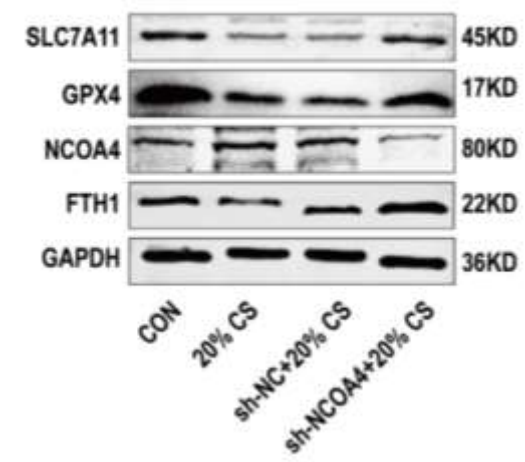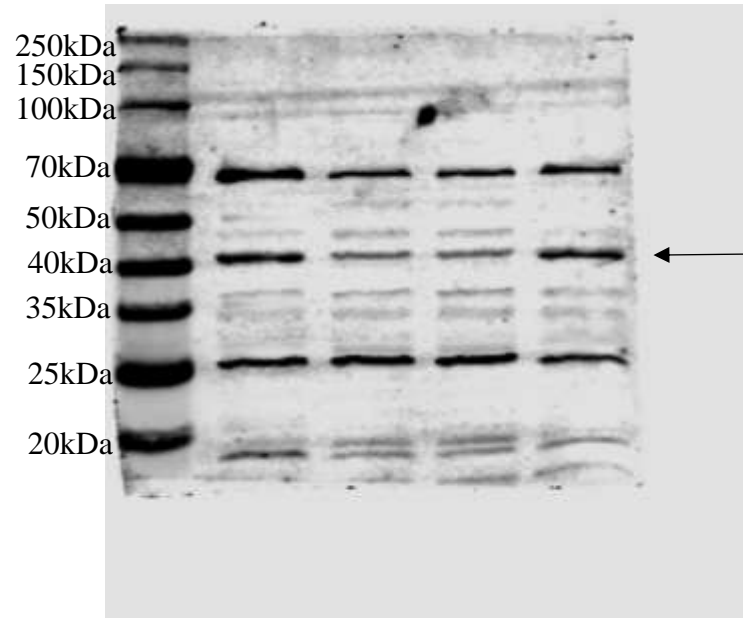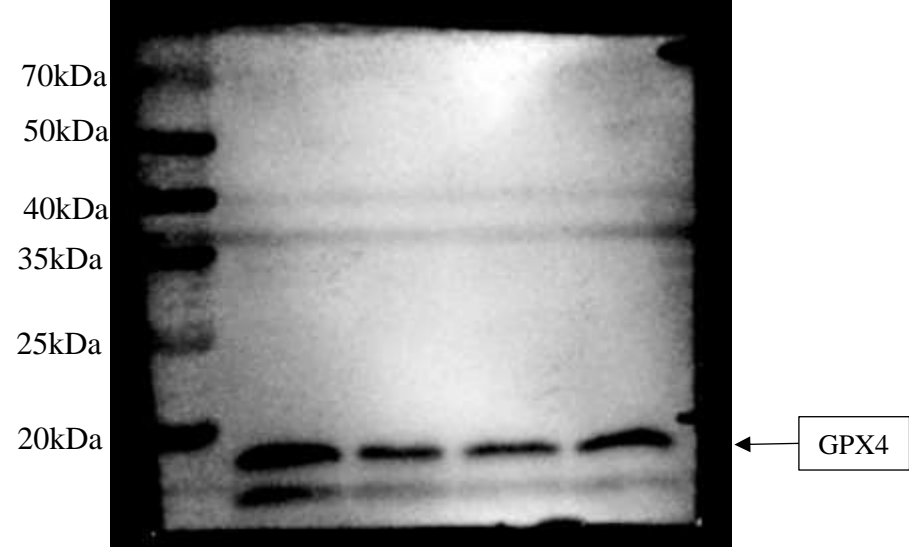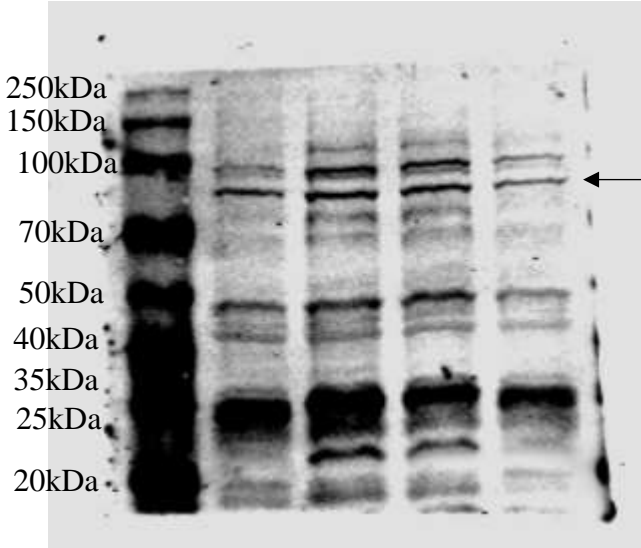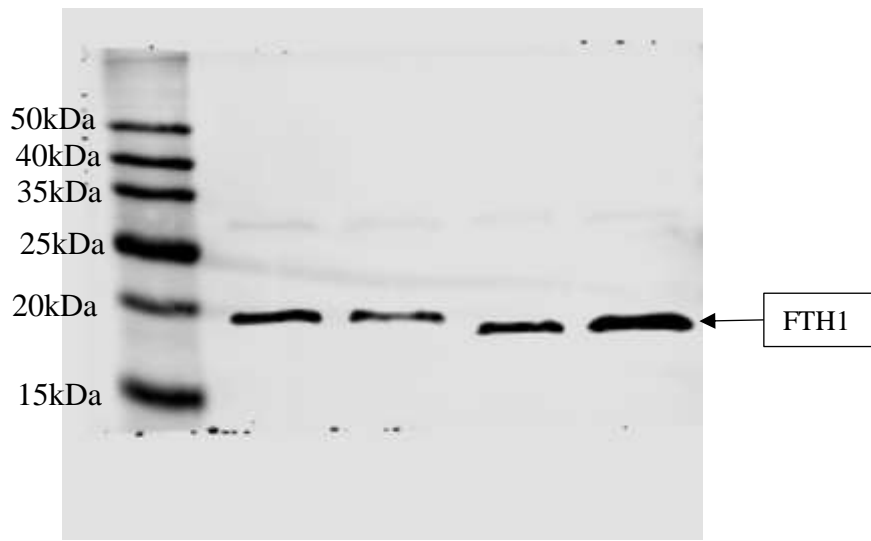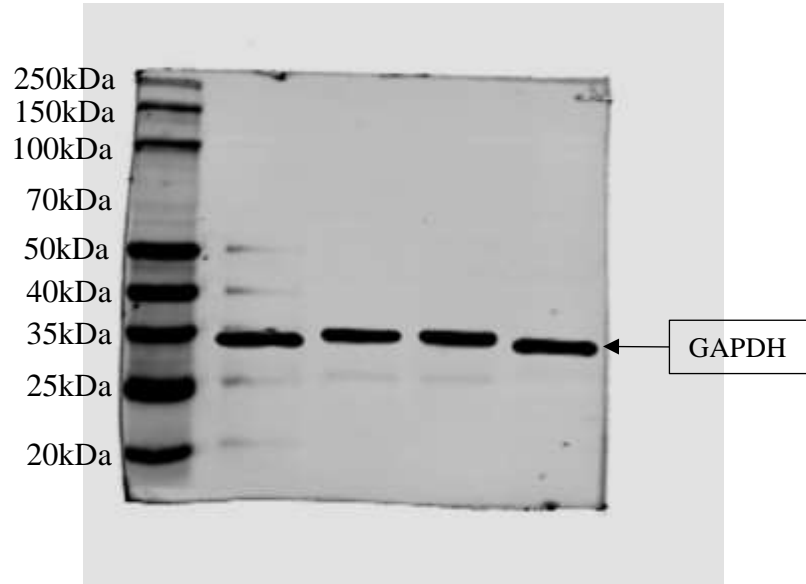

**Figure4**

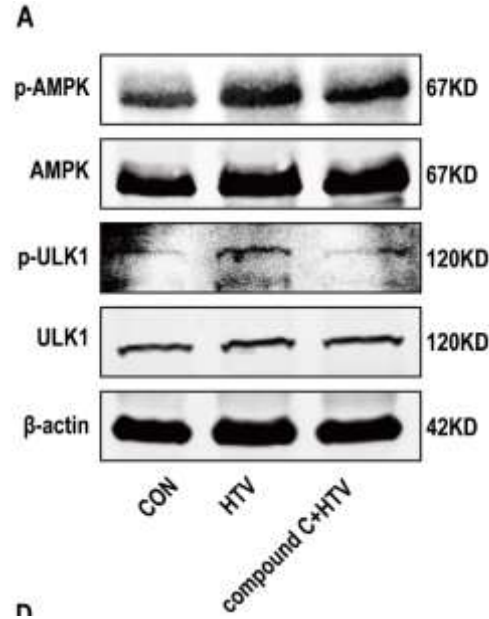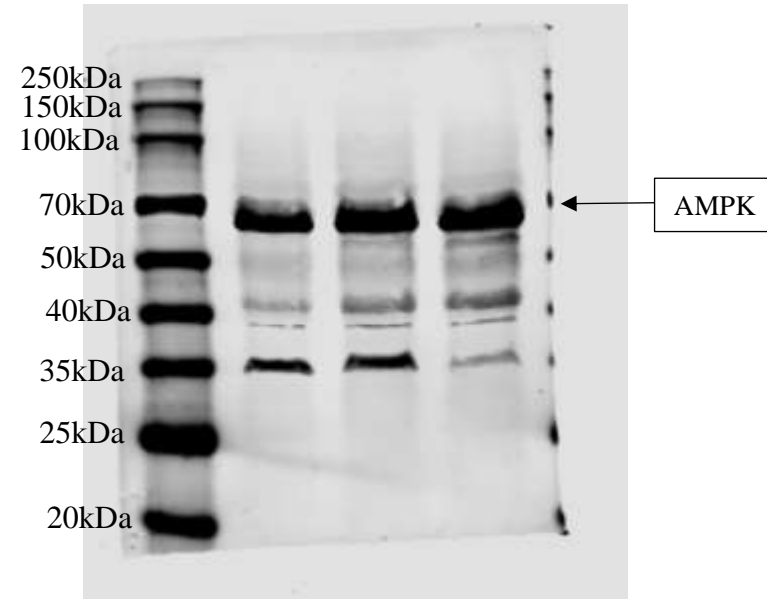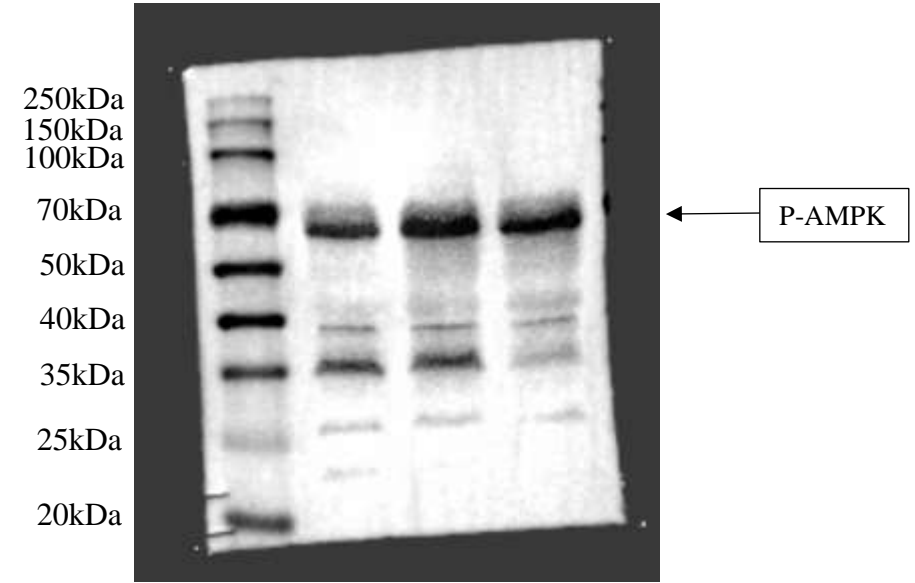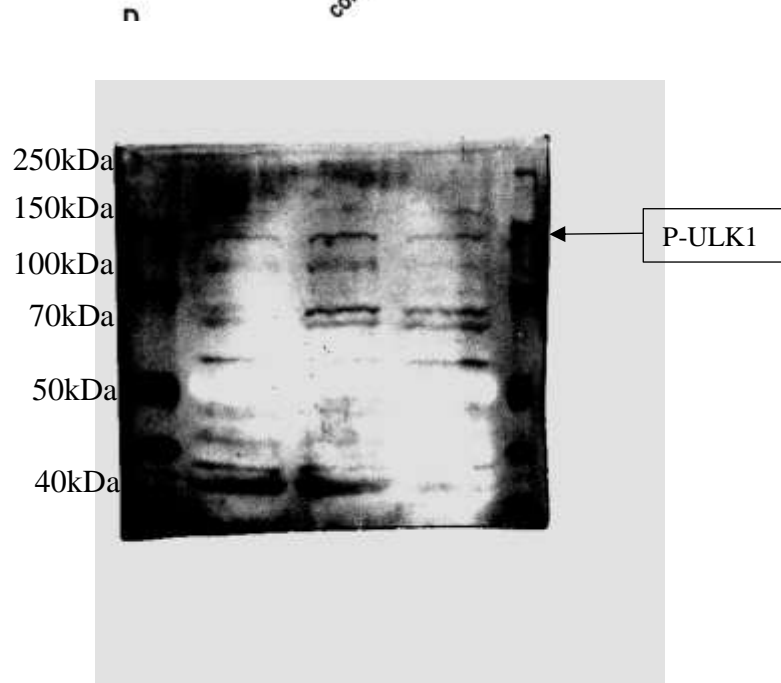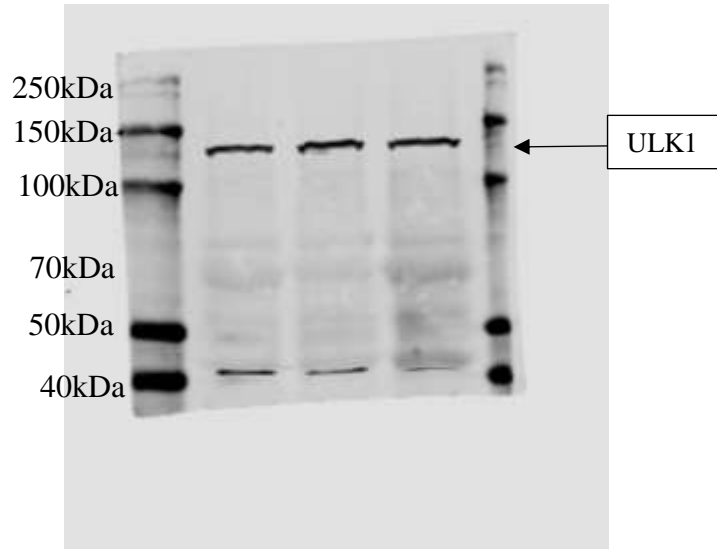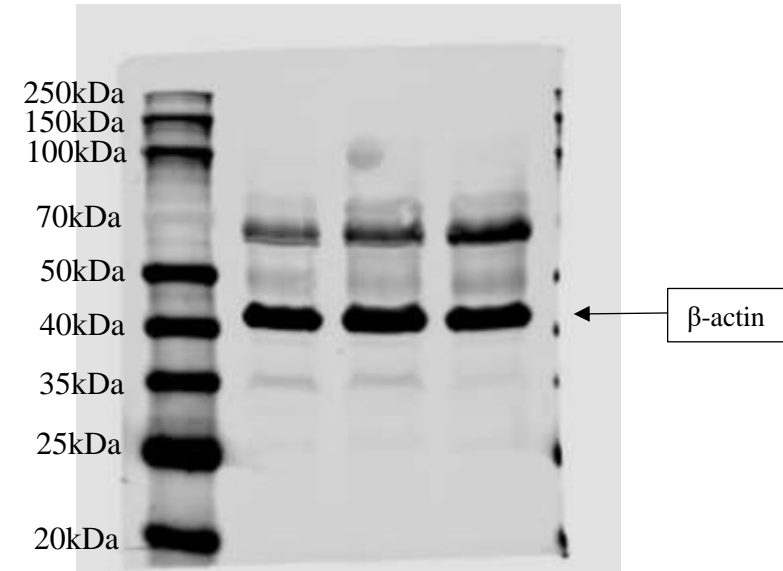

**Figure4**

**D**

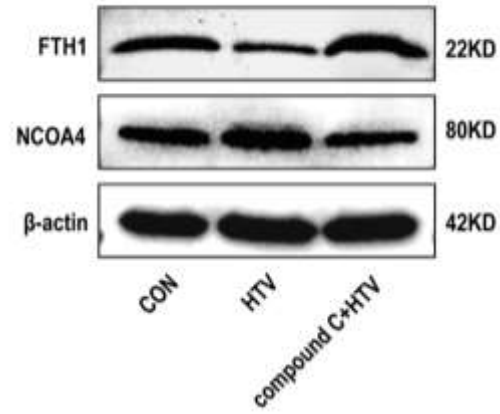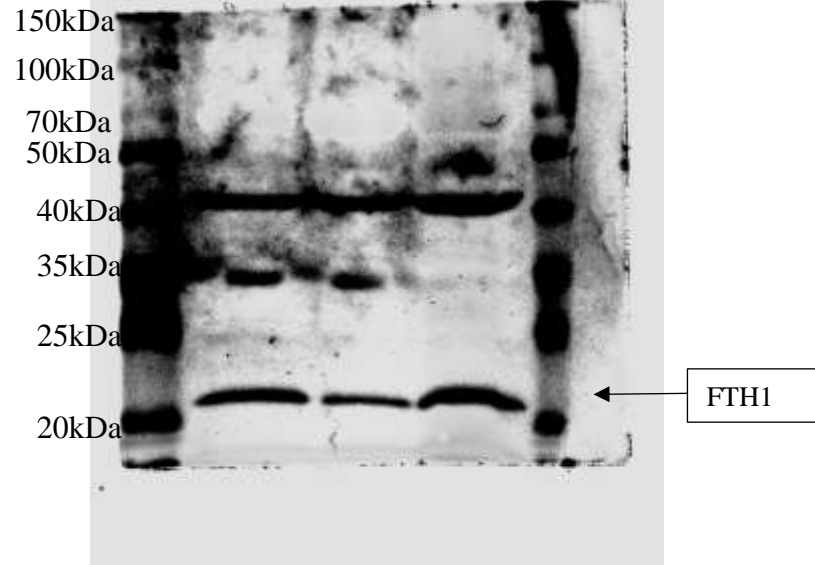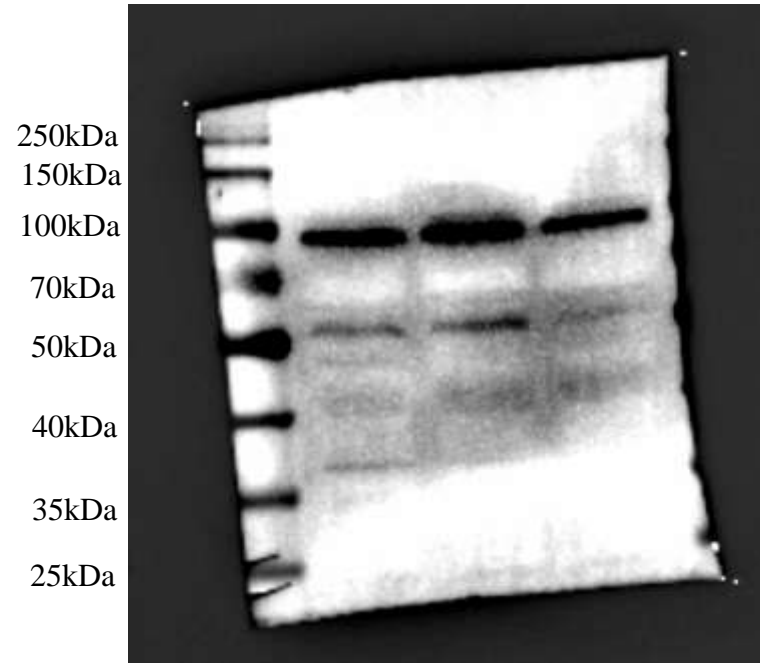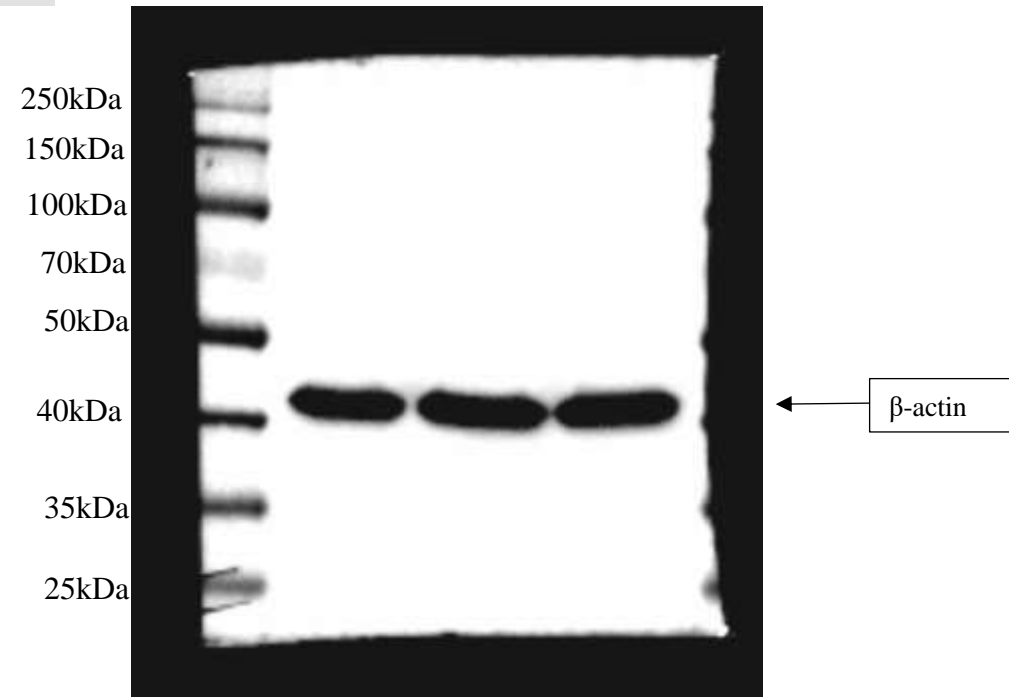

**Figure 5**

**A**

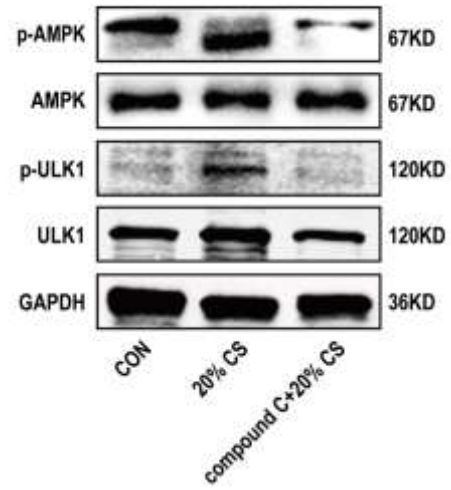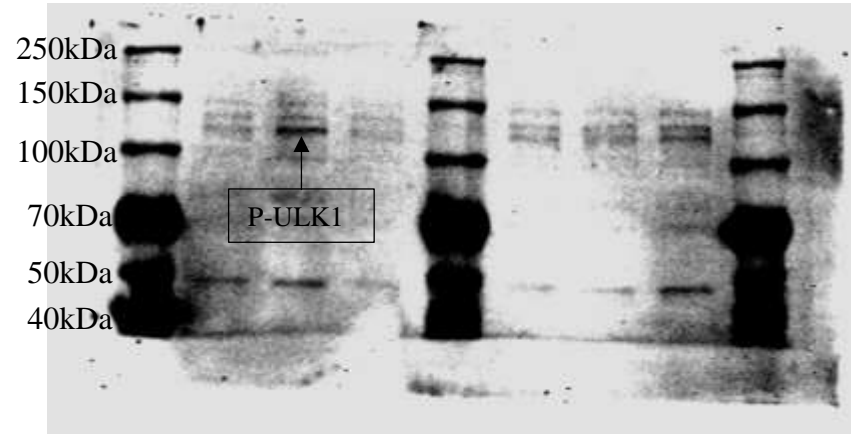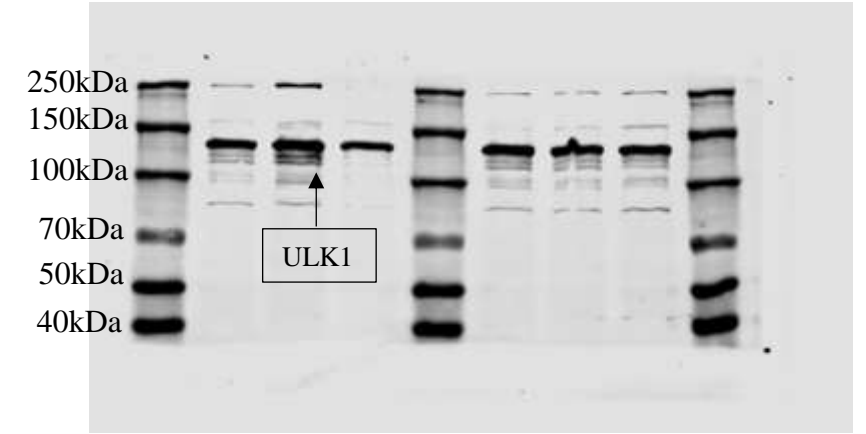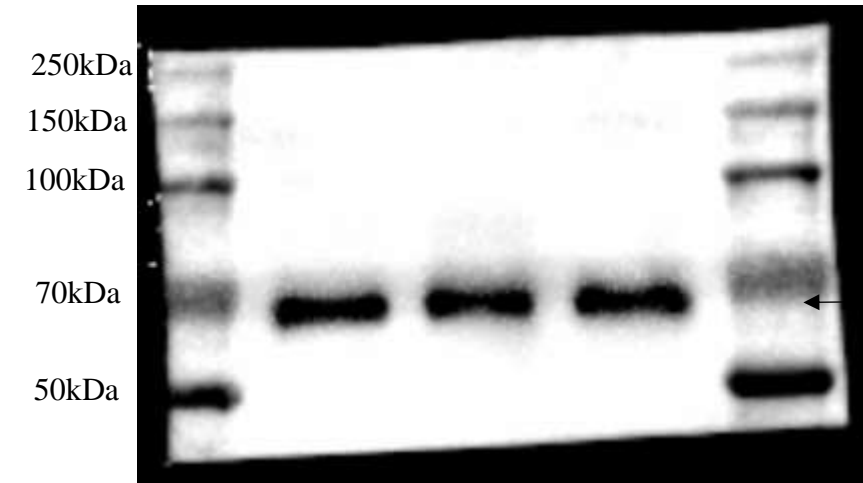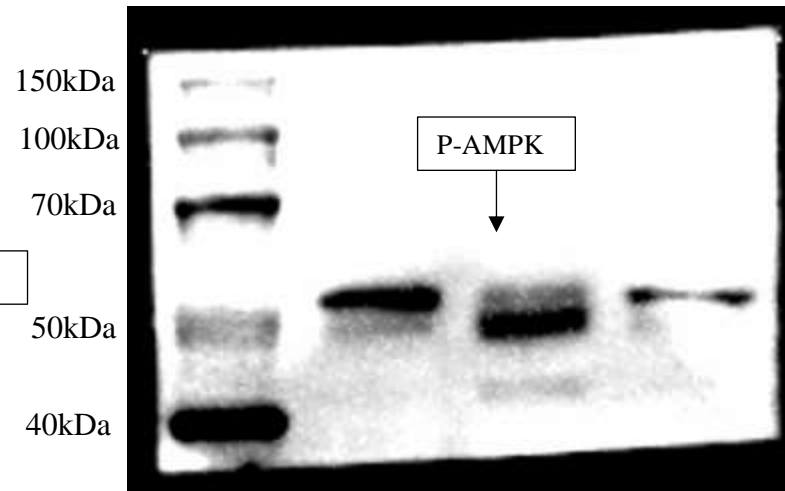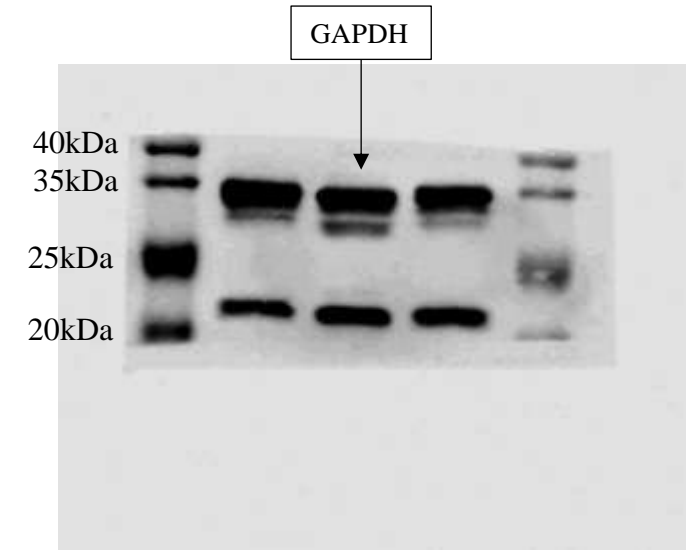

**Figure5**

**D**

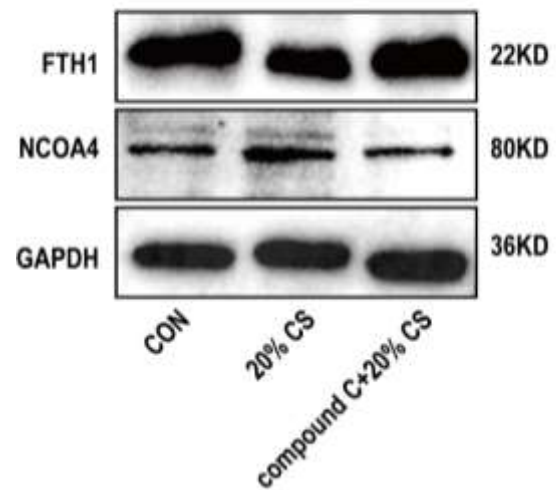

250kDa  
150kDa  
100kDa  
70kDa  
50kDa  
40kDa  
35kDa  
25kDa  
20kDa

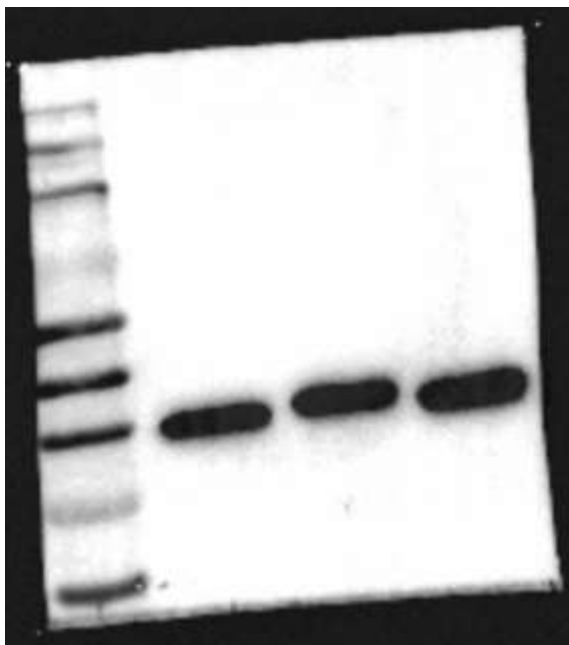

GAPDH

250kDa  
150kDa  
100kDa  
70kDa  
50kDa  
40kDa  
35kDa  
25kDa

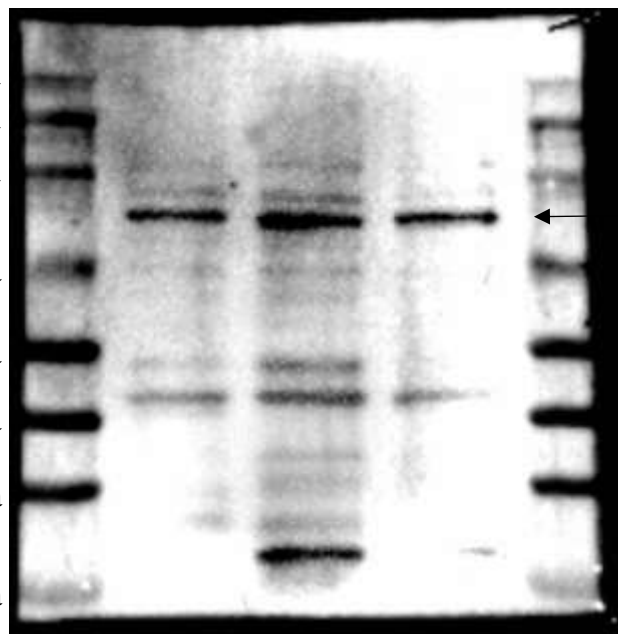

NCOA4

250kDa  
150kDa  
100kDa  
70kDa  
50kDa  
40kDa  
35kDa  
25kDa  
20kDa  
15kDa

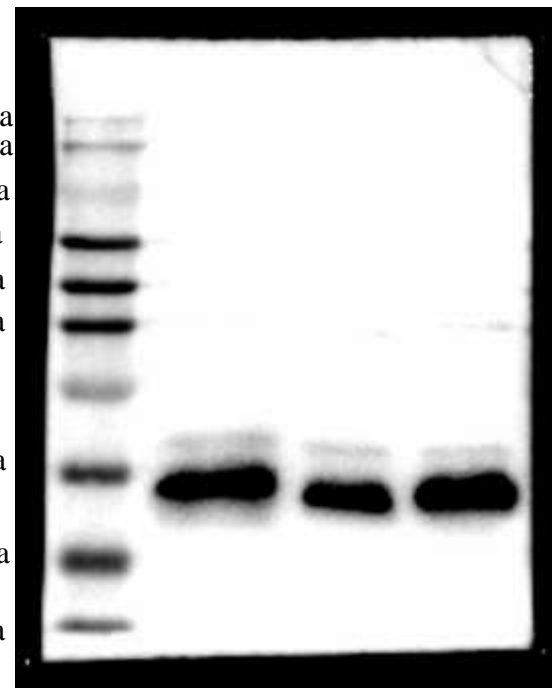

FTH1

# S Figure1

K

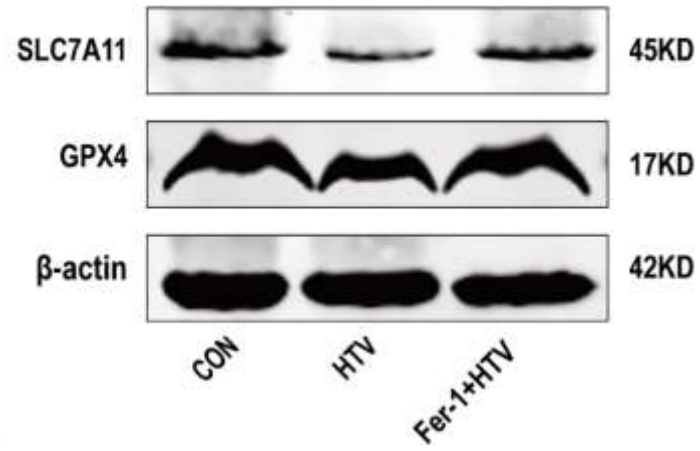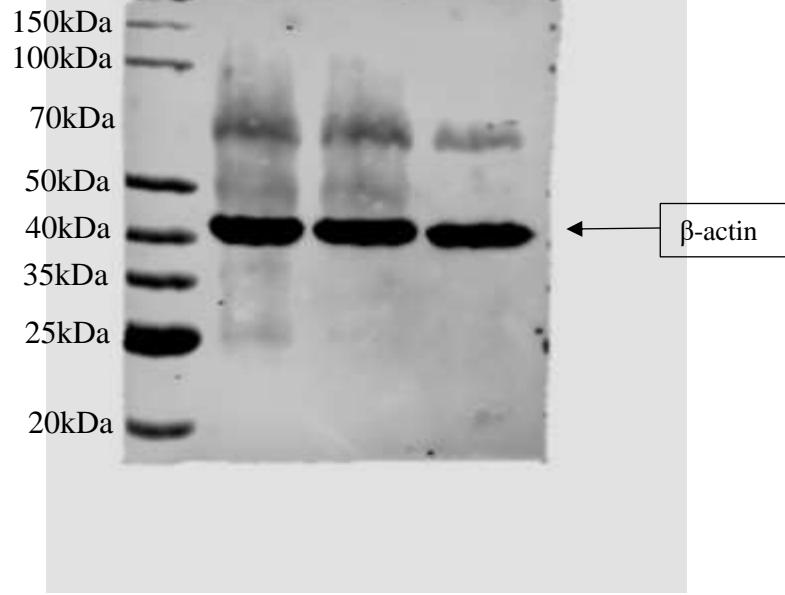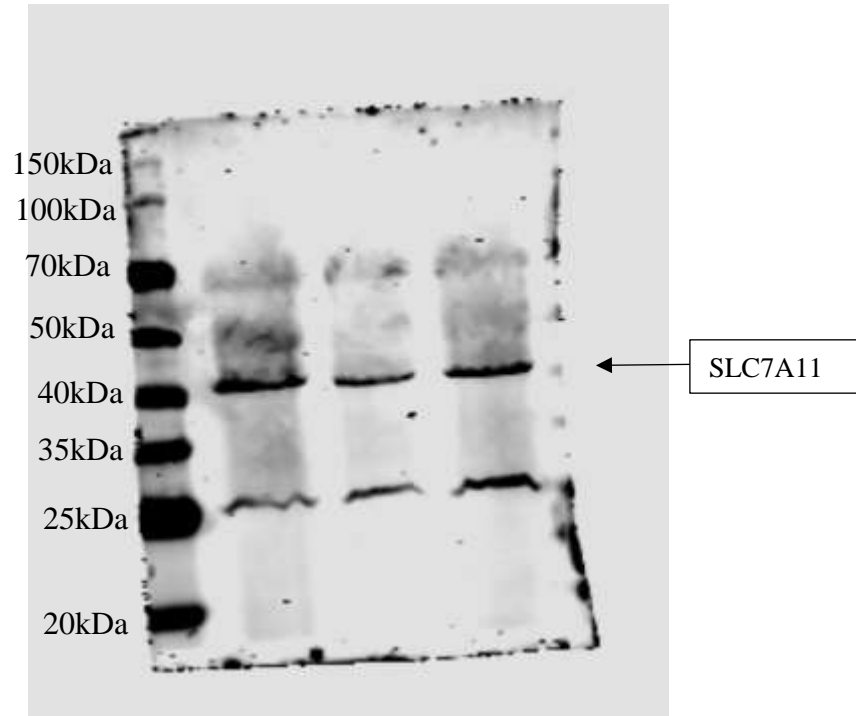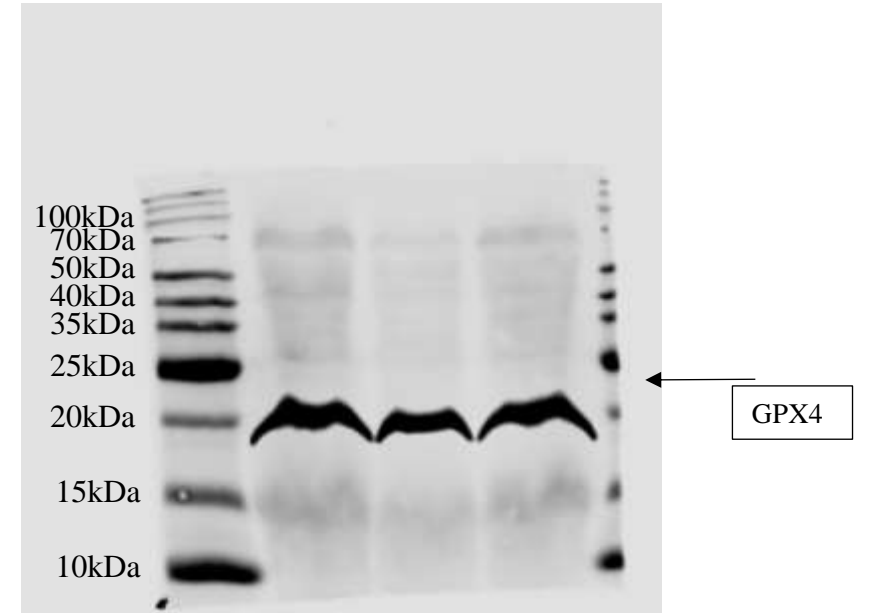



# S Figure2

F

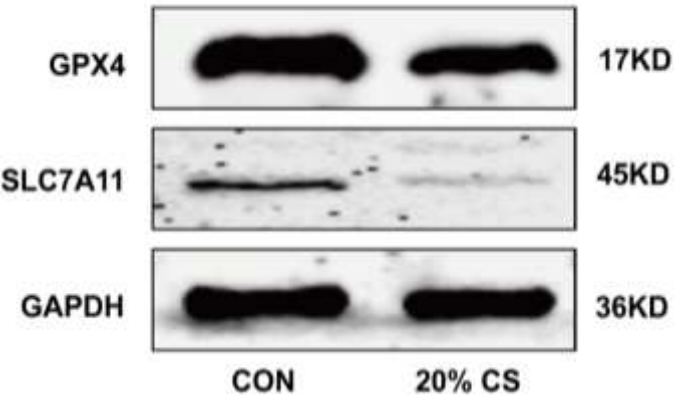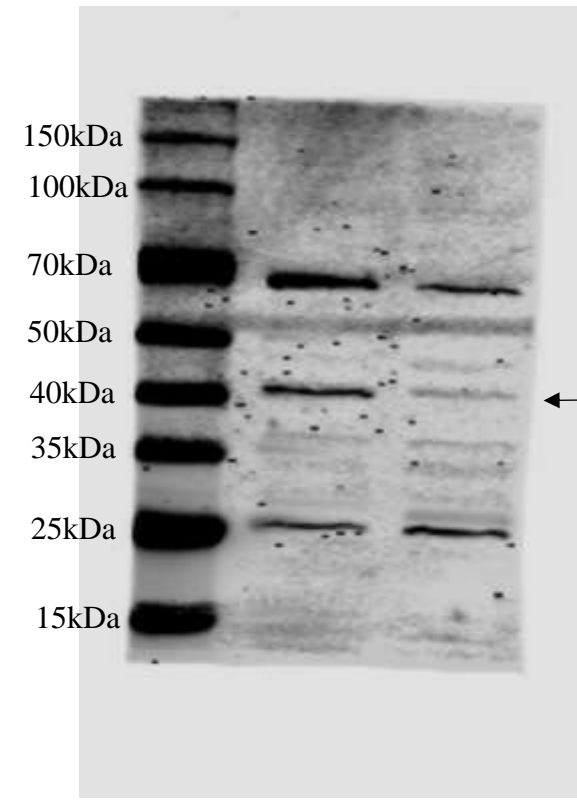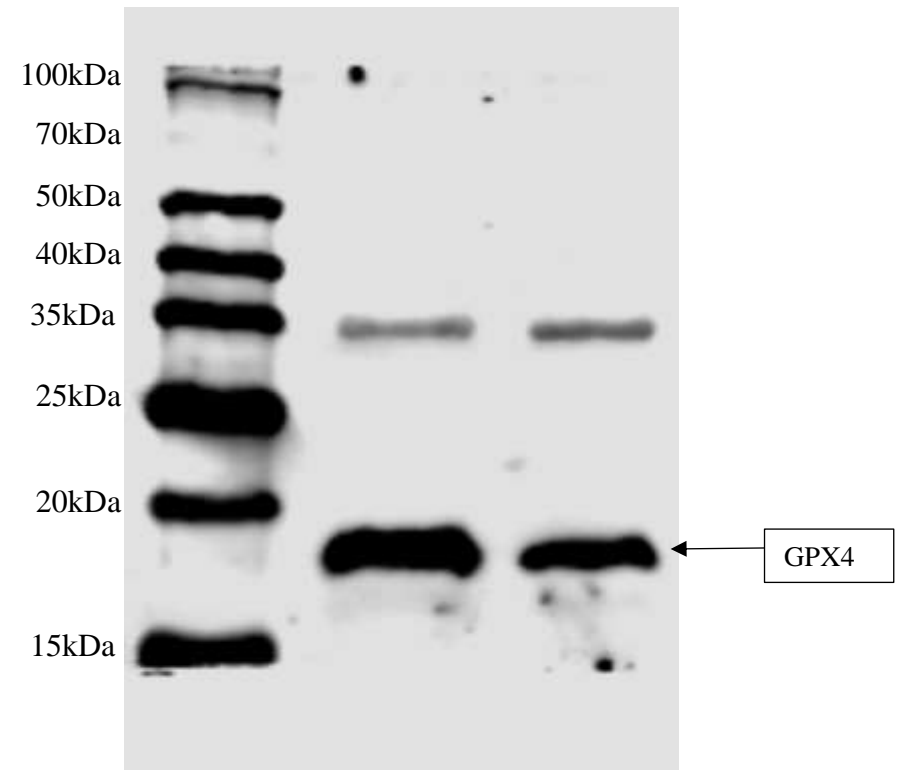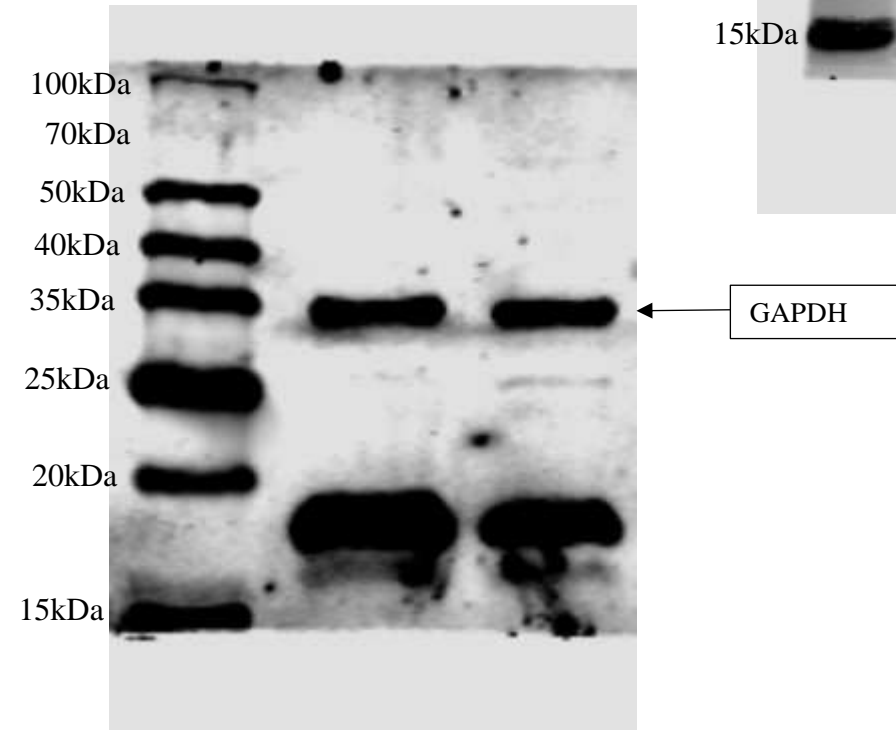

# S Figure2

J

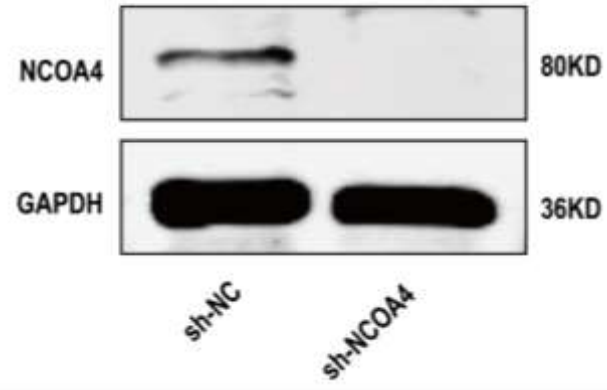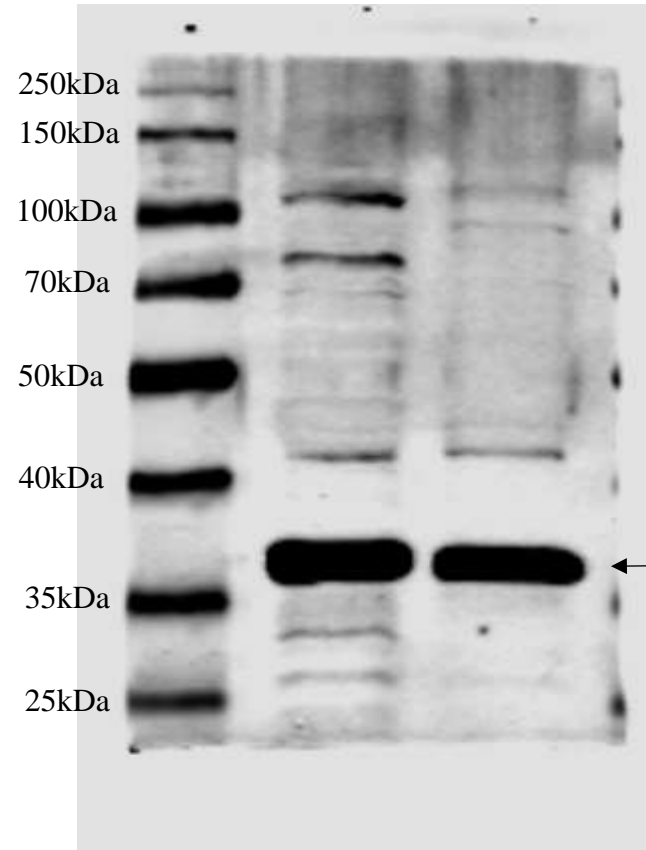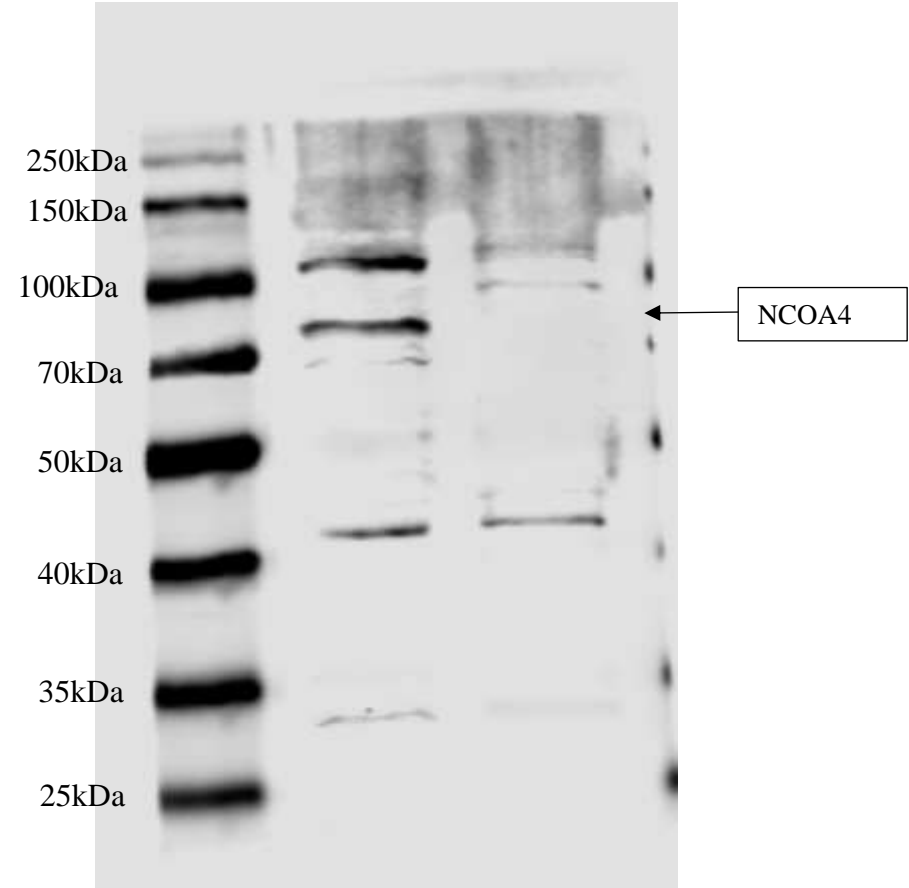

Supplement: 12931_2024_3076_MOESM1_ESM.pdf [file 12931_2024_3076_MOESM1_ESM.pdf]
